# Supplementary material for: Morph-specific protein patterns in the femoral gland secretions of a colour polymorphic lizard
Source: PubMed Central journal article supplement (PMC6557888; doi:10.1038/s41598-019-44889-7), 2019-06-10
Supplement: 41598_2019_44889_MOESM1_ESM.pdf [file 41598_2019_44889_MOESM1_ESM.pdf]

**Morph-specific protein patterns in the femoral gland secretions of a colour polymorphic lizard**

Marco Mangiacotti, Marco Fumagalli, Maddalena Cagnone, Simona Viglio, Anna Maria Bardoni, Stefano Scali, Roberto Sacchi

## SUPPLEMENTARY INFORMATION

*Original 2DE gels.* Here it follows the image list of the gels from the two-dimensional electrophoresis as they were originally acquired by VersaDoc Imaging Model 3000 (BioRad). Images were not manipulated, nor contrast and luminosity were altered. The same settings were used in each acquisition. For each colour-morph, the three best replicates actually used in the analysis are reported. Further, for each morph series, an inset with pH and weight scales has been added.

| Red morph                                                                            |  | replicate # |
|--------------------------------------------------------------------------------------|--|-------------|
| 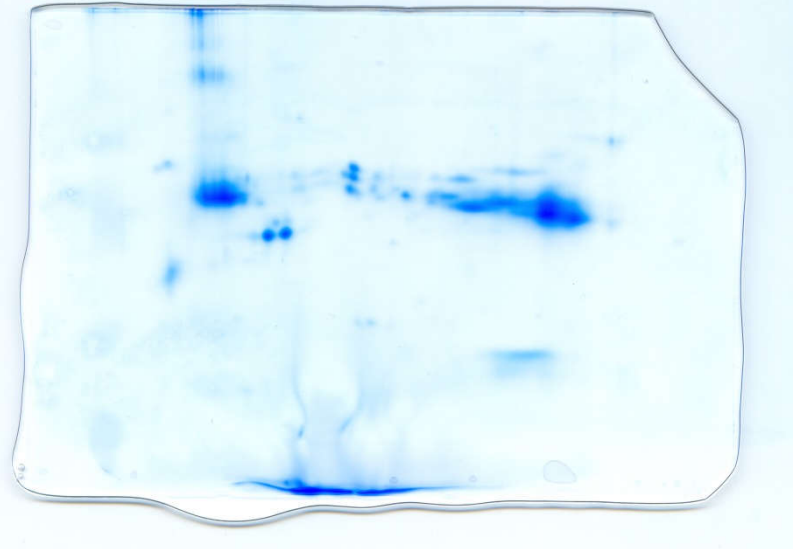   |  | 1           |
|   |  | 2           |
|  |  | 3           |
|   |  | scale       |

| White morph                                                                                                                      |  | replicate # |
|----------------------------------------------------------------------------------------------------------------------------------|--|-------------|
| 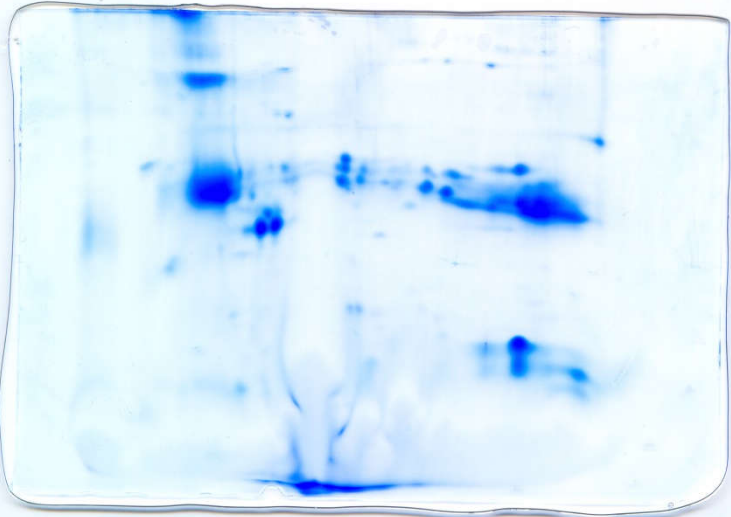                                               |  | 1           |
|                                               |  | 2           |
|                                              |  | 3           |
|  <p>kDa<br/>100<br/>10</p> <p>3 ← pH → 10</p> |  | scale       |

| Yellow morph                                                                                                                                                                       |  | replicate # |
|------------------------------------------------------------------------------------------------------------------------------------------------------------------------------------|--|-------------|
| 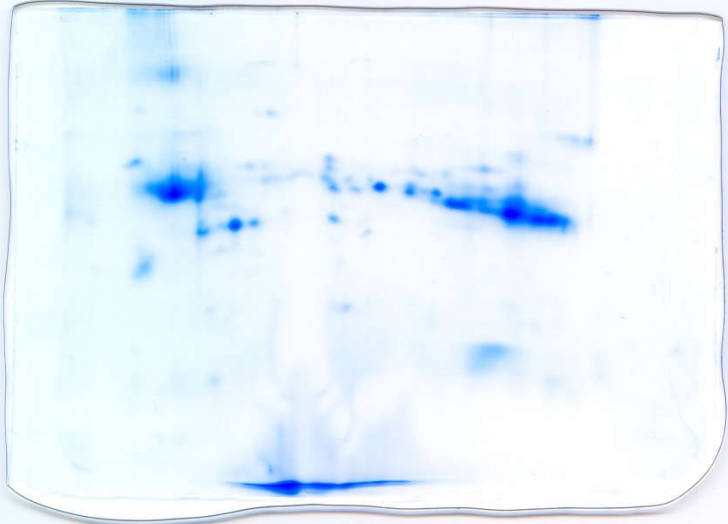                                                                                                 |  | 1           |
|                                                                                                 |  | 2           |
|                                                                                                |  | 3           |
|  <p>           3 ← pH → 10<br/>           kDa<br/>           100<br/>           10         </p> |  | scale       |
